# Supplementary material for: Donanemab exposure and efficacy relationship using modeling in Alzheimer's disease
Source: PubMed Central journal article supplement — Alzheimers Dement (N Y). 2023 Jun 28;9(2):e12404. doi: 10.1002/trc2.12404 (PMC10301702; doi:10.1002/trc2.12404), 2023-06-28
Supplement: TRC2-9-e12404-s002.pdf [file TRC2-9-e12404-s002.pdf]

# Supplemental Figure 1

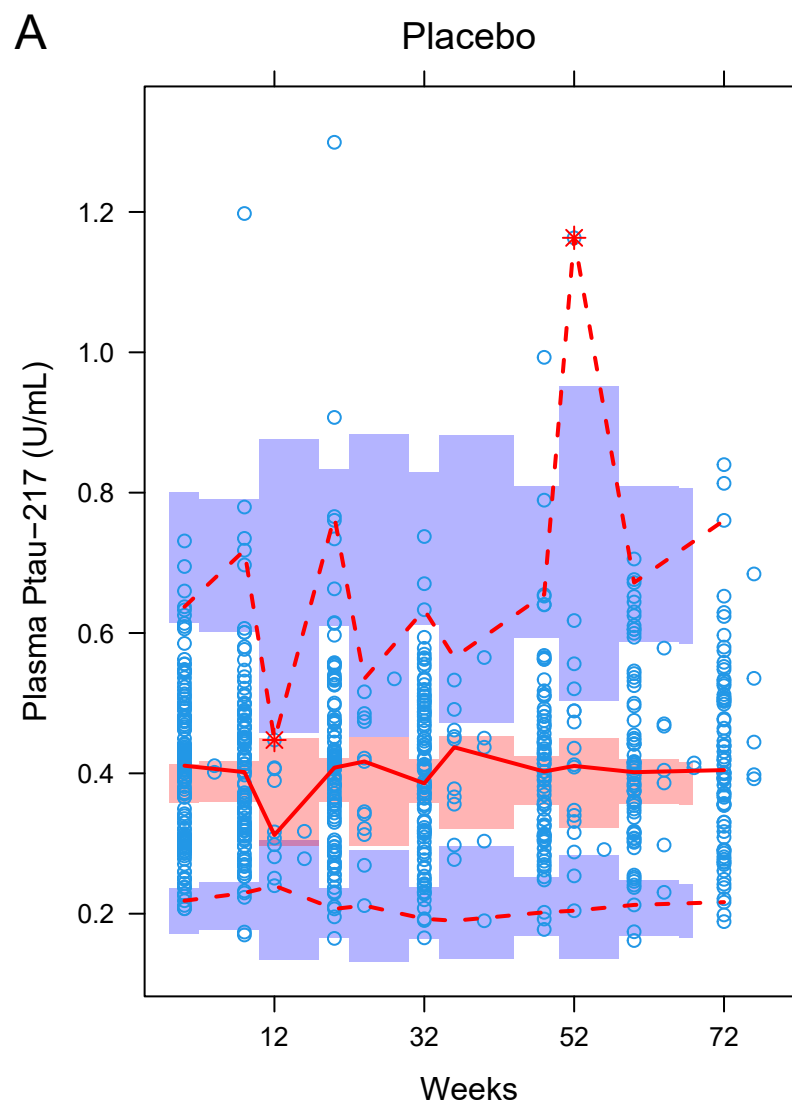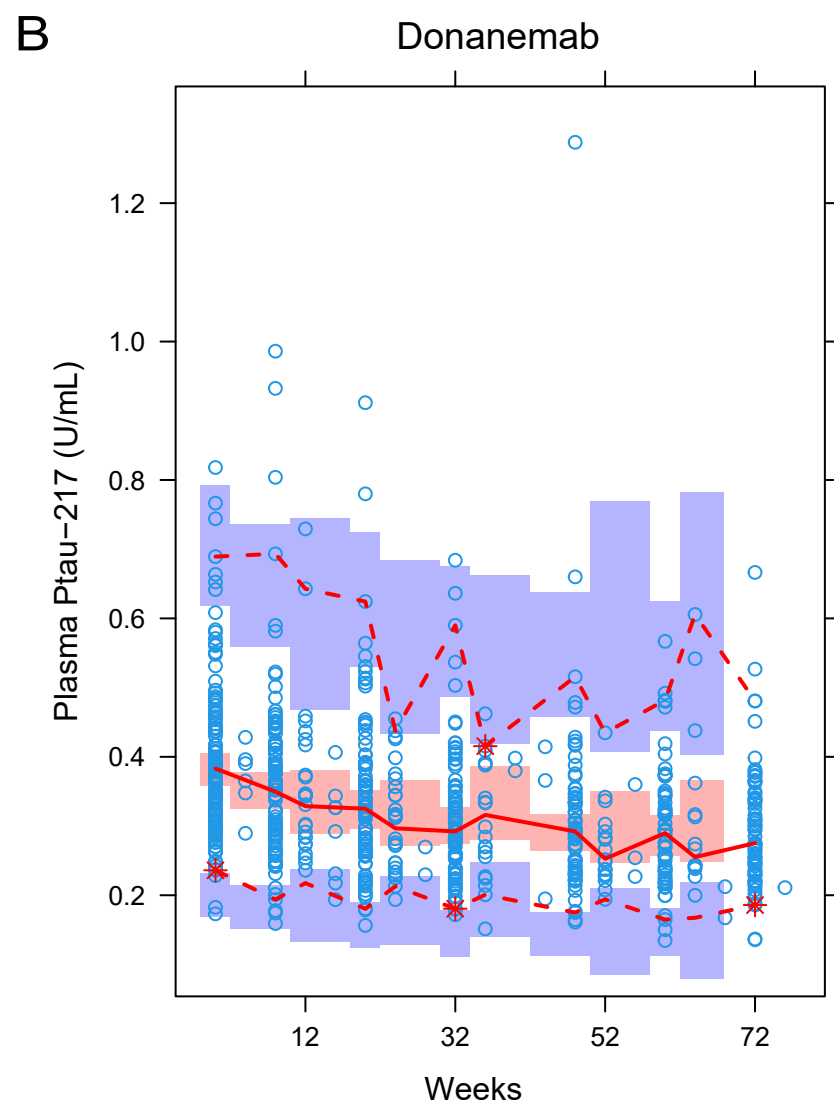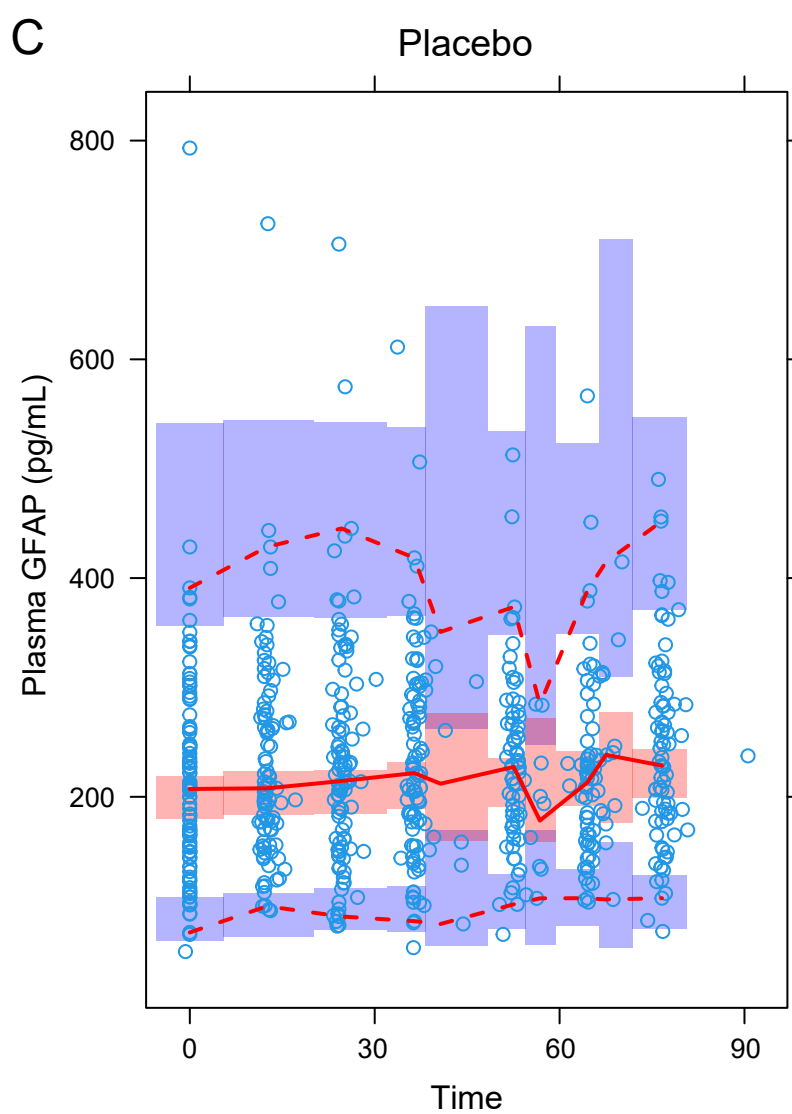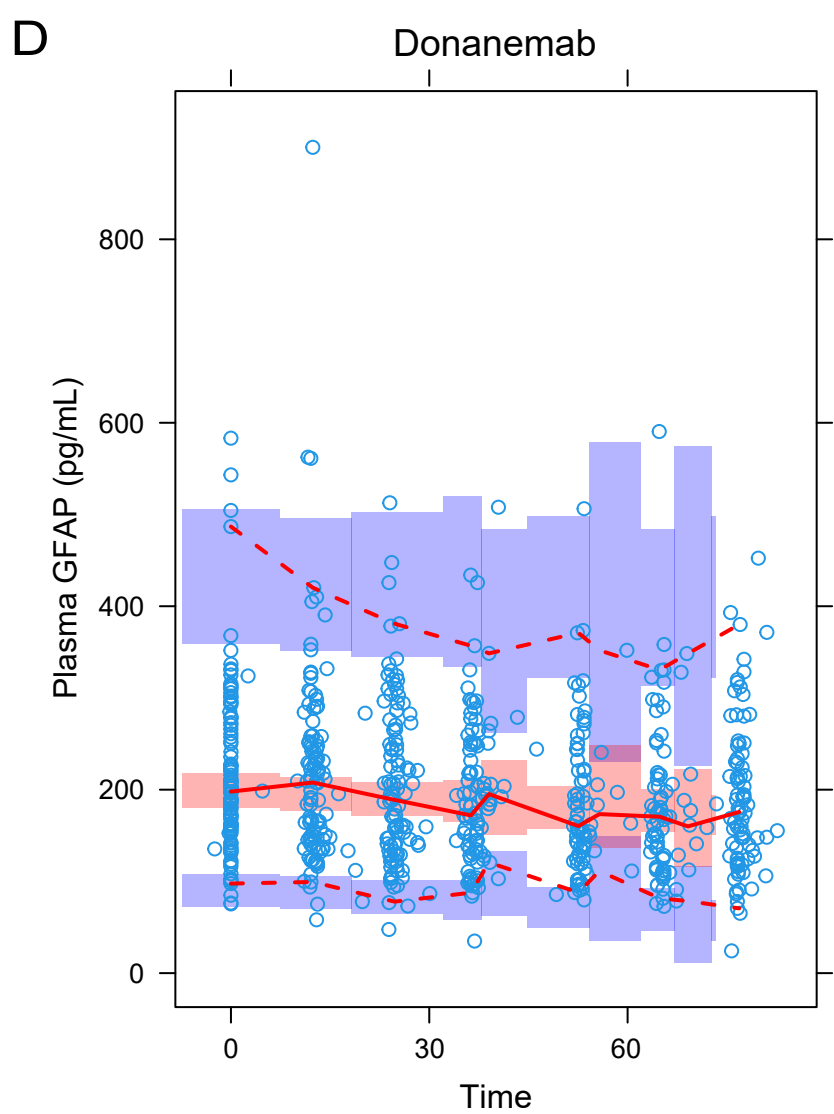

Supplemental Figure 1. Visual predictive check of final plasma biomarker models.

Visual predictive check of final plasma P-tau217 model for placebo (A) and donanemab (B) and of the final plasma GFAP model for placebo (C) and donanemab (D). The points are the observed data. The lines are the 5th, 50th, and 95th percentiles of the observed data. The shaded areas are the model-predicted 95% confidence interval of the corresponding percentiles.
