# Supplementary material for: Donanemab exposure and efficacy relationship using modeling in Alzheimer's disease
Source: PubMed Central journal article supplement — Alzheimers Dement (N Y). 2023 Jun 28;9(2):e12404. doi: 10.1002/trc2.12404 (PMC10301702; doi:10.1002/trc2.12404), 2023-06-28
Supplement: TRC2-9-e12404-s005.pdf [file TRC2-9-e12404-s005.pdf]

# Supplemental Figure 2

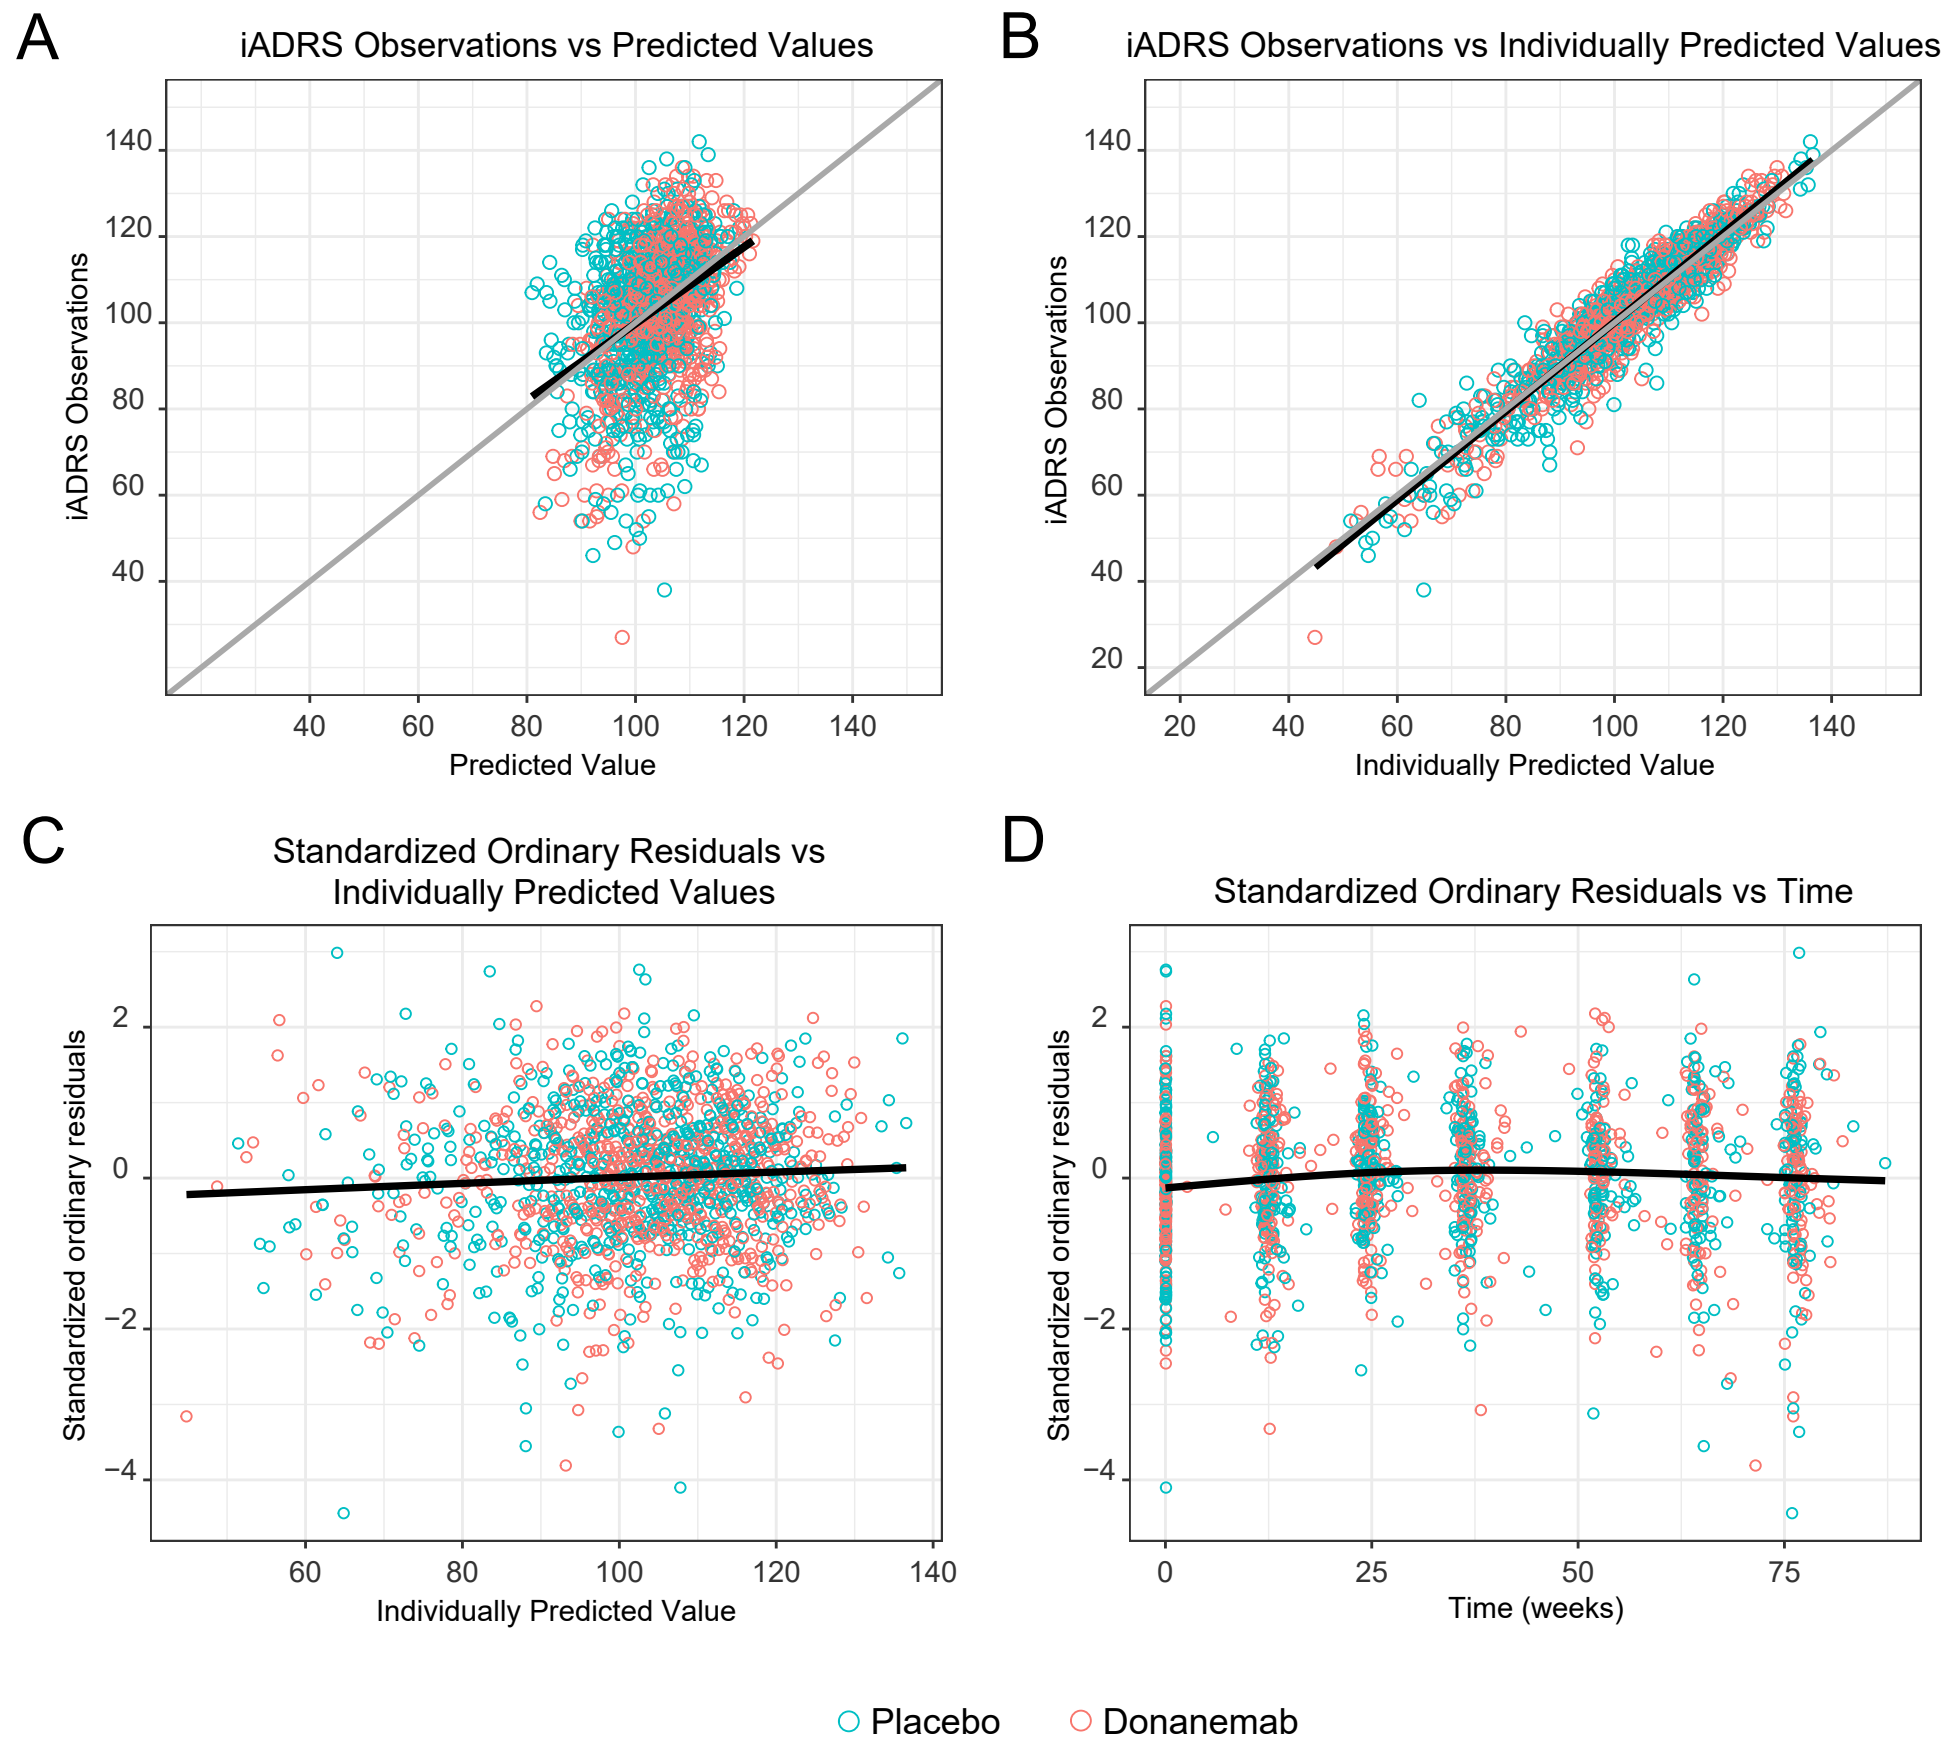

Supplemental Figure 2. Goodness of fit for iADRS disease progression model.

LOWESS fit, a smoothed value given by a weighted linear least-squares regression over the span of observations, for data are presented (black line) in addition to a line of identity (gray line on top panel).

Abbreviations: iADRS = integrated Alzheimer's disease rating scale; LOWESS = locally weighted scatterplot smoothing.
